# Supplementary material for: Photoactive Nanomaterials Inspired by Nature: LTL Zeolite Doped with Laser Dyes as Artificial Light Harvesting Systems
Source: MDPI journal article supplement (doi:10.3390/ma10050495), 2017-05-04
Supplement: s1 [file s1]

# Supplementary Materials: Photoactive Nanomaterials inspired by Nature: LTL zeolite doped with laser dyes as artificial light harvesting systems

Leire Gartzia-Rivero, Jorge Bañuelos and Iñigo López-Arbeloa

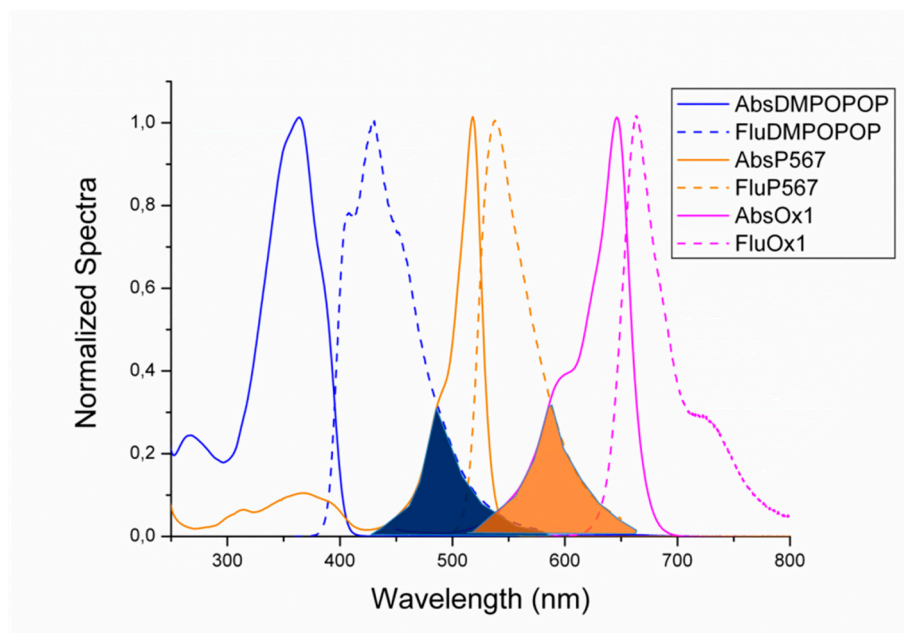

**Figure S1.** Normalized absorption and fluorescence spectra of the fluorophores Dmpopop, PM567 and Oxazine 1 in solution showing the corresponding spectral overlaps.

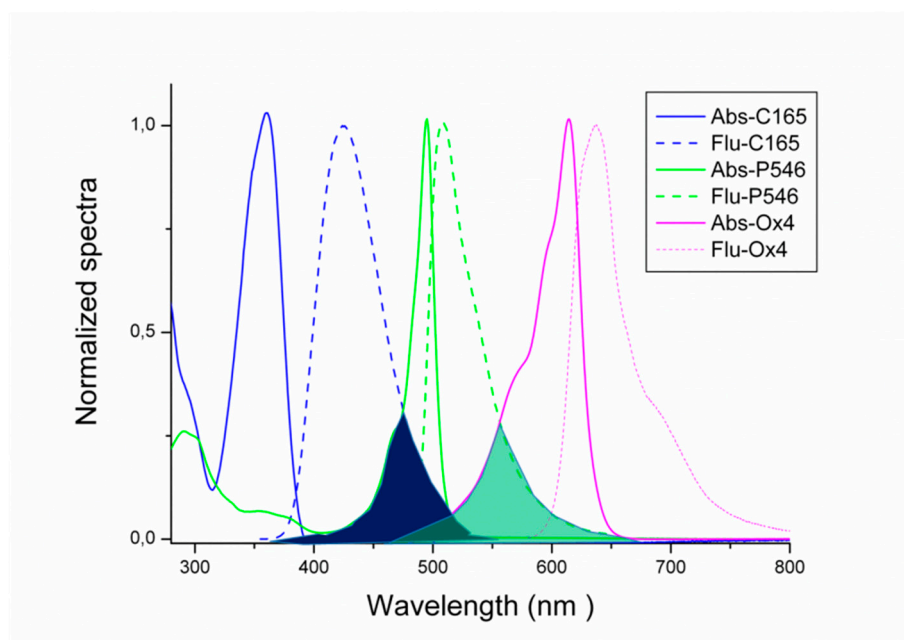

**Figure S2.** Normalized absorption and fluorescence spectra of the fluorophores C165, PM546 and Oxazine 4 in solution showing the corresponding spectral overlaps.

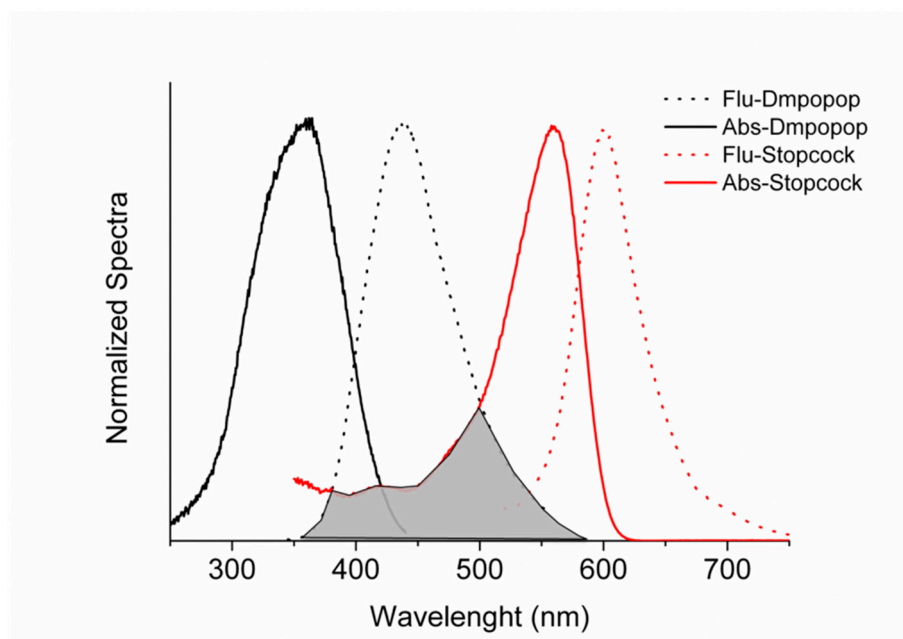

**Figure S3.** Normalized absorption and fluorescence spectra of the fluorophores Dmpopop and BODIPY-stopcock showing the corresponding spectral overlap.
